# Supplementary material for: Size induced modification of boron structural unit in YBO3: systematic investigation by experimental and theoretical methods
Source: Royal Society of Chemistry journal article supplement (doi:10.1039/c6ra12704e), 2016-01-01
Supplement: c6ra12704e1.pdf [file c6ra12704e1.pdf]

## Size induced modification of boron structural unit in YBO<sub>3</sub>: Systematic investigation by experimental and theoretical methods

Ramya Gopakumar Nair<sup>1</sup>, Sandeep Nigam<sup>1</sup>, B. Vishwanadh<sup>2</sup>, V. Sudarsan<sup>1</sup>, R. K. Vatsa<sup>1</sup>, C. Majumder<sup>1</sup> and V. K. Jain<sup>1</sup>

<sup>1</sup>Chemistry Division, <sup>2</sup>Materials Science Division,  
Bhabha Atomic Research Centre, Mumbai 400085, India

### Supporting Information

**Table-S1:** The calculated coordination parameters (using PAW–PBE) for monoclinic YBO<sub>3</sub> as compared with experiment.

| Atom | Position | DFT results in present work |        |        | Rietveld refinement of XRD pattern of 800°C heated sample in the present work |        |        | Values reported in <i>Chem. Mater.</i> 2004, 16, 2418-2424 |        |        |
|------|----------|-----------------------------|--------|--------|-------------------------------------------------------------------------------|--------|--------|------------------------------------------------------------|--------|--------|
|      |          | x                           | y      | z      | x                                                                             | y      | z      | x                                                          | y      | z      |
| Y1   | 4c       | 0.2500                      | 0.2500 | 0.0000 | 0.2500                                                                        | 0.2500 | 0.0000 | 0.2500                                                     | 0.2500 | 0.0000 |
| Y2   | 8f       | 0.0854                      | 0.2557 | 0.4993 | 0.0843                                                                        | 0.2561 | 0.5007 | 0.0825                                                     | 0.2487 | 0.4985 |
| B1   | 8f       | 0.1201                      | 0.0377 | 0.2469 | 0.1220                                                                        | 0.0382 | 0.2476 | 0.1257                                                     | 0.0815 | 0.2371 |
| B2   | 4e       | 0.0000                      | 0.6759 | 0.2500 | 0.0000                                                                        | 0.6780 | 0.2500 | 0.0000                                                     | 0.6393 | 0.2500 |
| O1   | 8f       | 0.1261                      | 0.0919 | 0.1030 | 0.1258                                                                        | 0.0830 | 0.1057 | 0.1182                                                     | 0.1152 | 0.1005 |
| O2   | 8f       | 0.2227                      | 0.0929 | 0.3883 | 0.2209                                                                        | 0.0900 | 0.3894 | 0.2233                                                     | 0.1035 | 0.3847 |
| O3   | 8f       | 0.0480                      | 0.5659 | 0.3917 | 0.0478                                                                        | 0.5650 | 0.3938 | 0.0605                                                     | 0.5911 | 0.3758 |
| O4   | 8f       | 0.3914                      | 0.3082 | 0.2517 | 0.3932                                                                        | 0.3090 | 0.2543 | 0.3814                                                     | 0.3398 | 0.2639 |
| O5   | 4e       | 0.0000                      | 0.1354 | 0.2500 | 0.0000                                                                        | 0.1399 | 0.2500 | 0.0000                                                     | 0.1583 | 0.2500 |

**Table-S2:** Relative concentration of BO<sub>3</sub> and BO<sub>4</sub> structural units determined by <sup>11</sup>B MAS NMR Studies

| sample       | Duration of heating | BO <sub>3</sub>                                                                                                   | BO <sub>4</sub> |
|--------------|---------------------|-------------------------------------------------------------------------------------------------------------------|-----------------|
| As prepared  | 5h                  | Could not be determined accurately, as the phase formed is some sort of a complex/different from YBO <sub>3</sub> |                 |
| 500°C heated | 5h                  | 56%                                                                                                               | 44%             |
| 600°C heated | 5h                  | 53%                                                                                                               | 47%             |
| 800°C heated | 5h                  | ~0%, could not be determined                                                                                      | Almost 100%     |

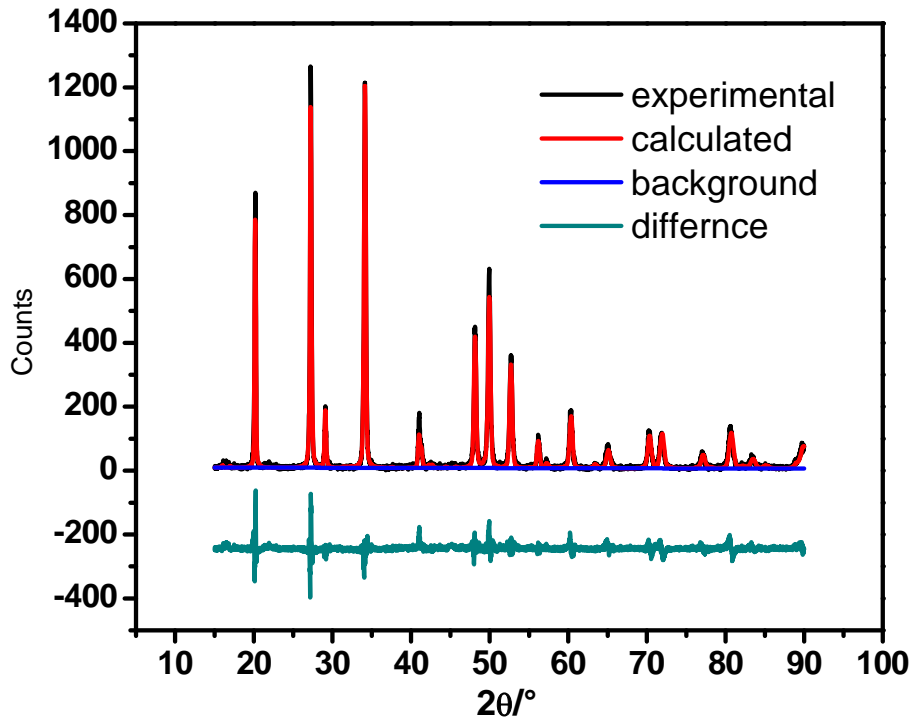

**Figure-S1: Rietveld refined XRD pattern for YBO<sub>3</sub> sample annealed at 800°C**

Formula : YBO<sub>3</sub>

space group : C2/c

Lattice constants : a = 11.328(1)Å, b = 6.5274(7)Å and c = 9.5461(7)Å

with  $\alpha = \gamma = 90^\circ$  and  $\beta = 113.05^\circ$ .

Goodness of fit ( $\chi^2$ ) = 1.872

R<sub>p</sub>, R<sub>wp</sub> = 0.1559, 0.2194

R<sub>f</sub><sup>2</sup> = 0.1163

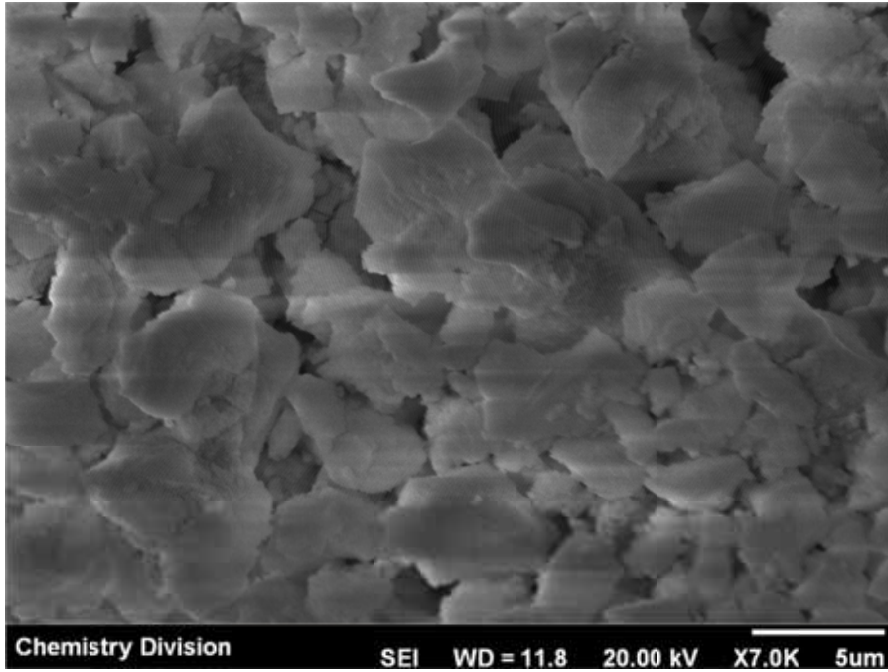

**Figure-S2: SEM micrograph of 800°C heated YBO<sub>3</sub> samples.**

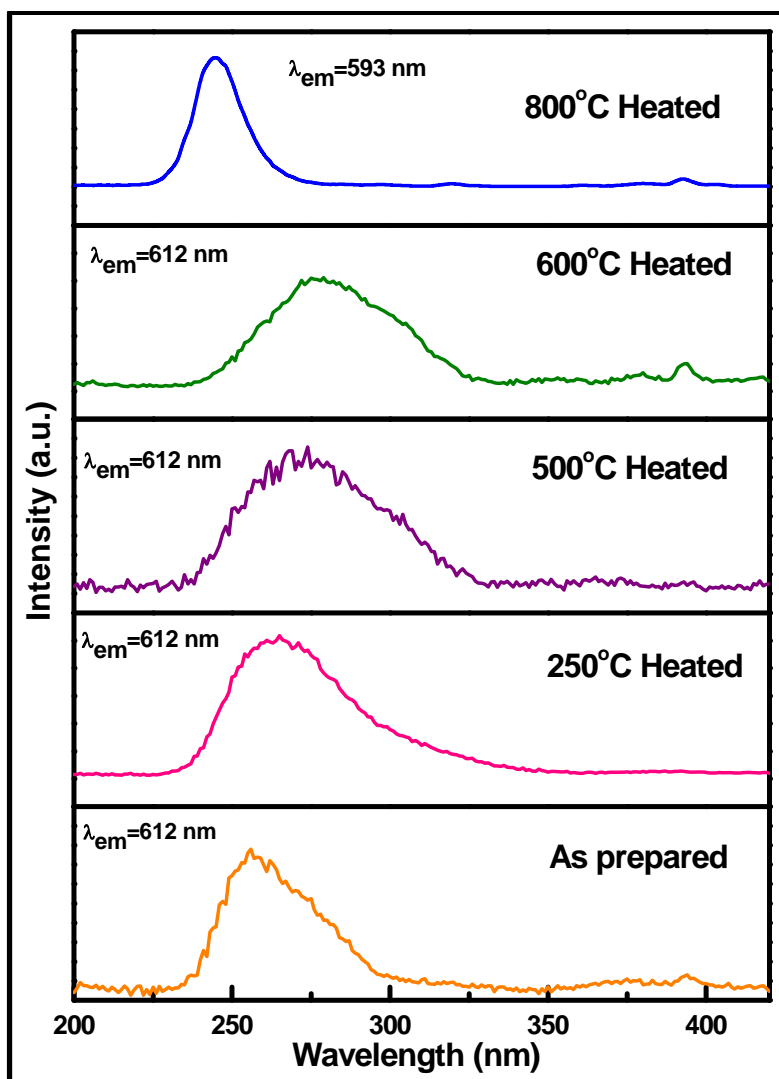

**Figure-S3:** Excitation spectra from Eu-doped precursor sample obtained by the reaction of  $Y^{3+}$  ions with boric acid followed by heating at different temperatures. The spectrum was recorded by monitoring the strongest emission peak of  $Eu^{3+}$  ions in corresponding emission spectra.

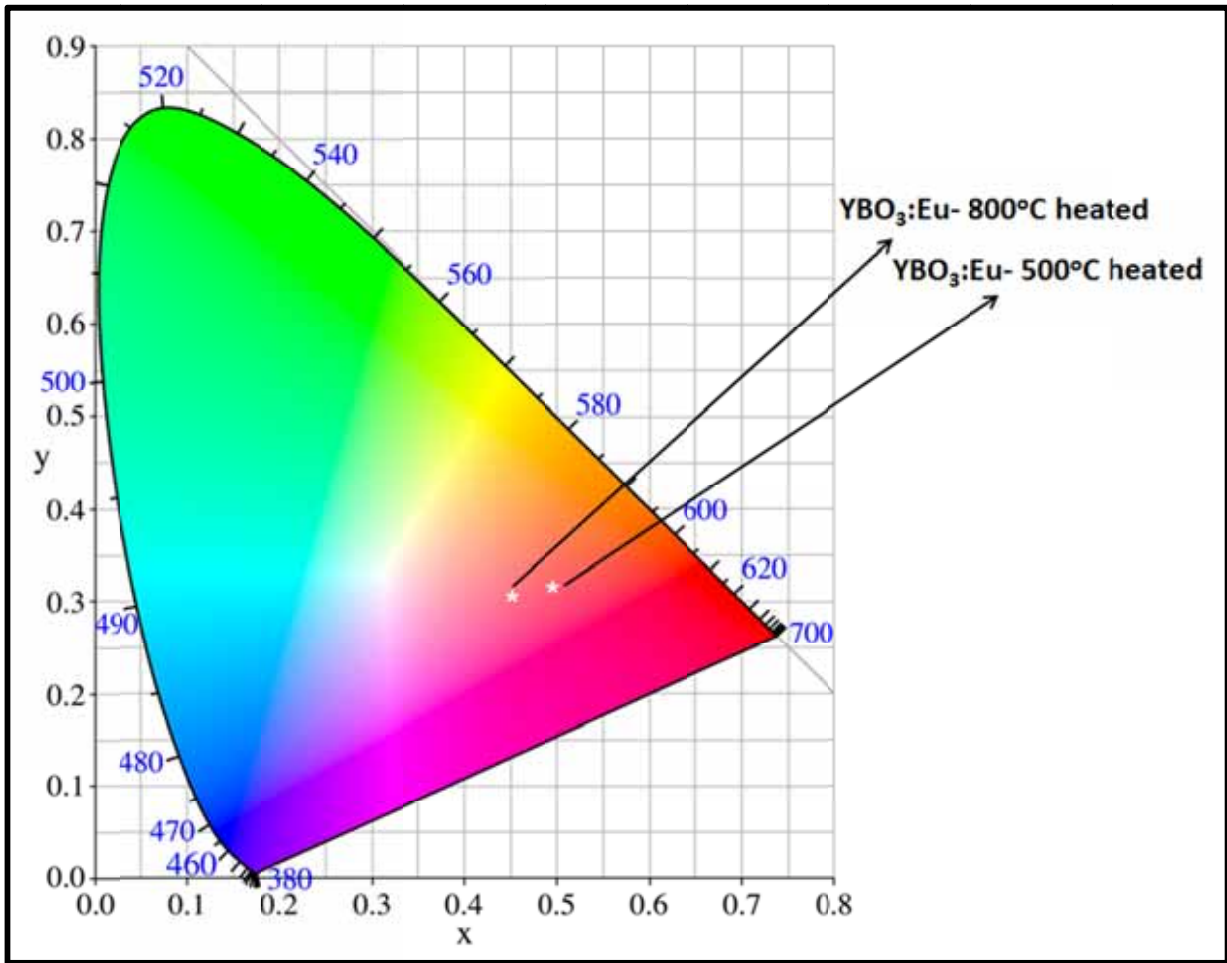

Figure-S4: CIE color coordinates of  $\text{YBO}_3$  samples.

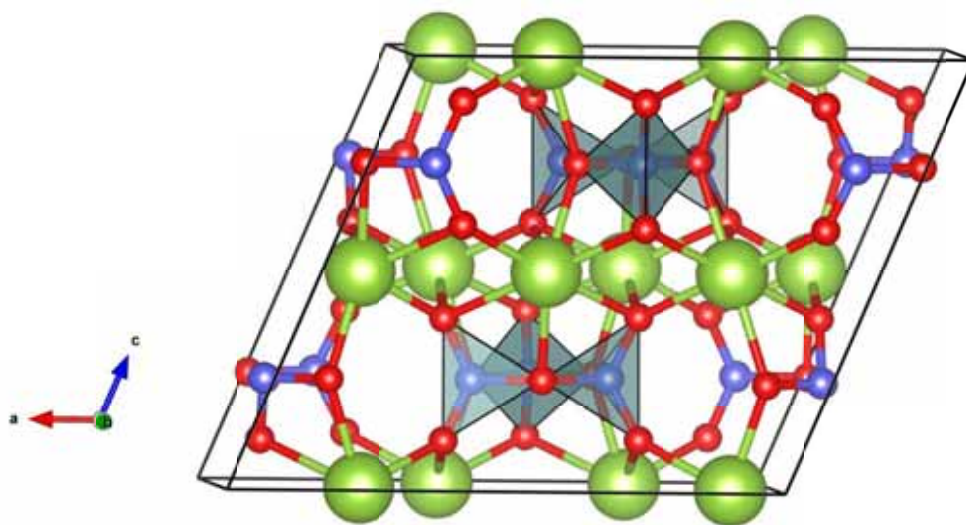

Figure S5: Representative crystal unit cell of  $\text{YBO}_3$ .

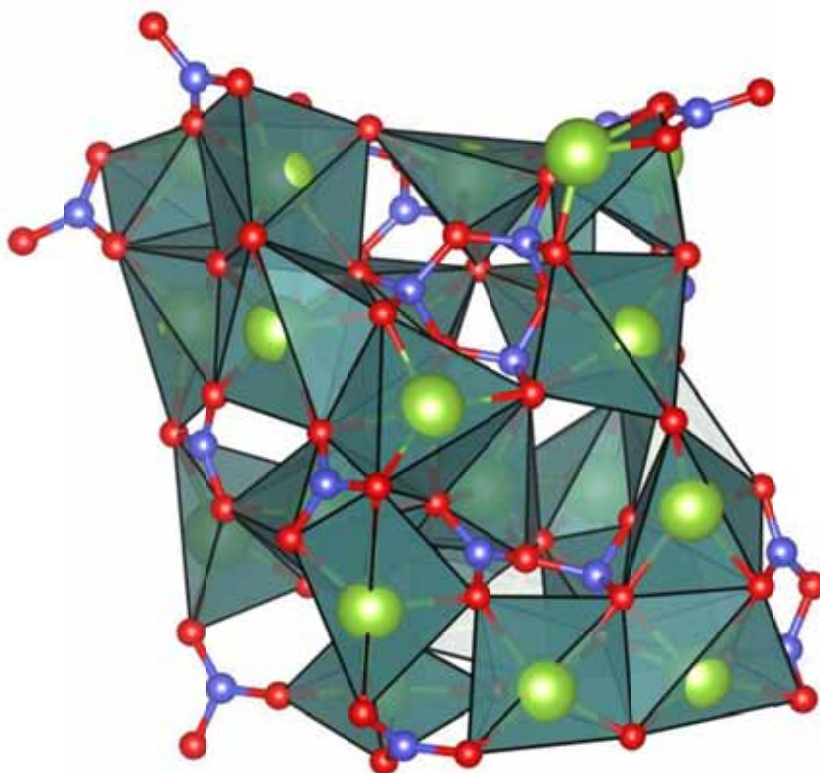

Figure-S6:  $\text{YBO}_3$  nanoparticle structure obtained from DFT calculations.
